# Supplementary material
Source: publisher figshare collection journal article supplement (https://rs.figshare.com/ndownloader/files/17890583)

Supplementary Figure 6. Multispecies coalescent topology of the 75% complete dataset of 10 million quartets produced by SVDquartets with 100 BS support. Black circles indicate  $\geq 95\%$ , grey circles indicate  $\geq 75\text{--}\leq 94\%$ , and white indicate  $\leq 74\%$  bootstrap support.

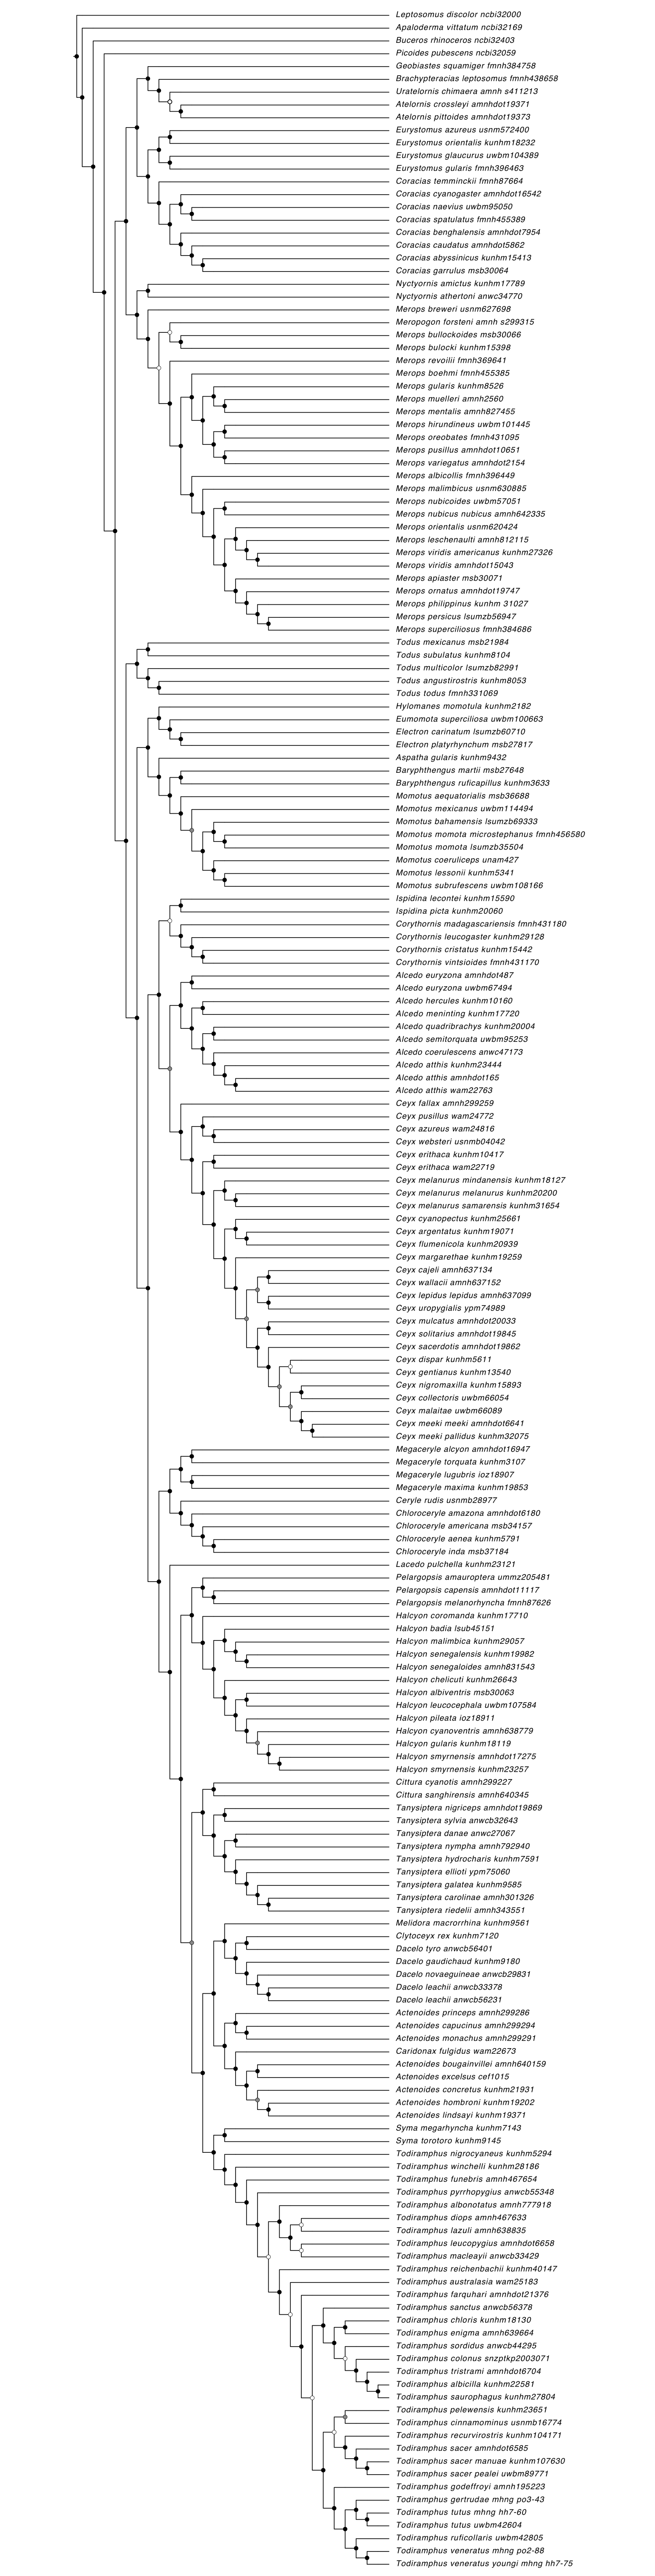

Supplement: Supplementary file 1 [file 17890583]
